# Supplementary material
Source: PubMed Central journal article supplement (PMC3637691)
Supplement: 1220372110_pnas.201220372SI.pdf [file 1220372110_pnas.201220372SI.pdf]

# Supporting Information

Nguyen et al. 10.1073/pnas.1220372110

## SI Text

A codling moth ortholog of *EF-1 $\alpha$*  (LG5 in *Bombyx mori*), used as a reference gene for testing sex-linkage of selected codling moth genes by quantitative real-time PCR (qPCR), was cloned, sequenced (see Table S2 for its accession number) and used for BAC library screening (Table S3). Moreover, the codling moth BAC library was screened for an ortholog of the *Acetylcholinesterase 2* (*Ace-2*) gene (GenBank accession no. DQ267976), which is also autosomal in *B. mori* (Table S1). The *Ace-2* ortholog was used to evaluate the accuracy of qPCR for linkage testing. Subsequent FISH experiments with BAC clones containing either *Elongation factor 1 alpha* (*EF-1 $\alpha$* ) or *Ace-2* and the Z-linked *Resistant to dieldrin* (*Rdl*) gene confirmed an autosomal location for

both the *EF-1 $\alpha$*  and *Ace-2* genes in the codling moth (Fig. S1 A and B).

Determination of sex-linkage by means of qPCR was first verified using the *kettin* and *Ace-2* genes that were already mapped to the codling moth Z chromosome and an autosome, respectively (Fig. 1 and Fig. S1B). The *kettin*-to-*EF-1 $\alpha$*  gene dose ratio was about twice as high in males as in females, thus proving the Z-linkage of *kettin*. Conversely, results of quantitative analysis of the *Ace-2* gene did not differ significantly between males and females, which is consistent with the autosomal location of the codling moth *Ace-2* gene as confirmed by BAC-FISH. These results show that the qPCR is a useful and reliable tool for the gene dose based determination of sex-linked versus autosomal inheritance (Fig. 3, Fig. S2, and Table S4).

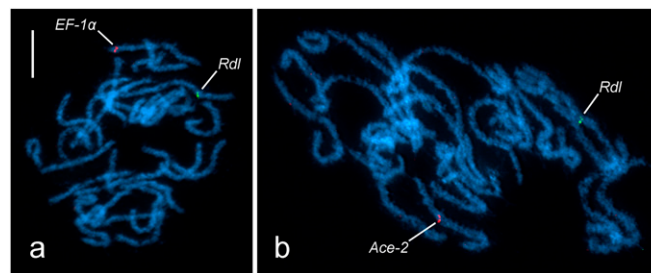

**Fig. S1.** BAC-FISH localization of two unmapped genes in comparison with a Z-linked gene on chromosome preparations of the codling moth, *Cydia pomonella*. Chromosomes were counterstained with DAPI (light blue). Hybridization signals of BAC probes (green and red) indicate the physical positions of loci marked by abbreviated names. (A and B) Pachytene spermatocyte complements. (A) Cohybridization of the BAC probe containing the Z-linked *Rdl* gene with BAC probe containing the *EF-1 $\alpha$*  gene proved autosomal localization of *EF-1 $\alpha$* . (B) Sex-linkage of the *Ace-2* gene was excluded by cohybridization of BAC probe in turn containing the Z-linked *Rdl* gene. (Scale bar: 10  $\mu$ m.)

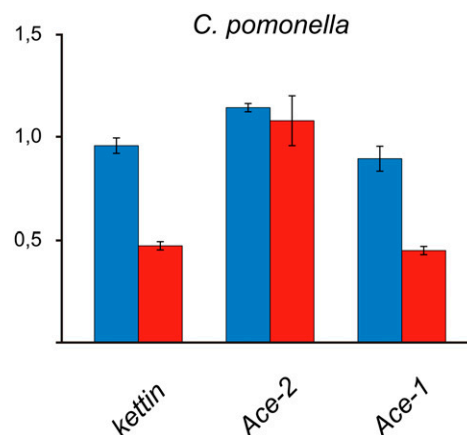

**Fig. S2.** qPCR determination of sex-linkage of the *Ace-1* gene in the codling moth, *Cydia pomonella*. Male (blue columns) and female (red columns) doses of *kettin*, *Ace-2*, and *Ace-1* genes normalized to the autosomal reference gene *EF-1 $\alpha$*  are compared. A vertical bar at each column indicates the SD from three independent replicates. The *kettin* to *EF-1 $\alpha$*  gene dose ratio was twice as high in males as in females due to the Z-linkage of *kettin* gene, whereas the relative dose of the autosomal *Ace-2* gene did not differ significantly between males and females. A twofold difference in the *Ace-1*-to-*EF-1 $\alpha$*  gene dose ratios between males and females suggests Z-linkage of the *Ace-1* gene.

**Table S1. *B. mori* orthologs of genes isolated in this study**

| Name                                          | Symbol       | Public ID* | Chromosome position*     | Scaffold position*         |
|-----------------------------------------------|--------------|------------|--------------------------|----------------------------|
| <i>Shaker</i>                                 | <i>Shkr</i>  | BMgn003851 | chr1: 20911282–20921258  | Bm_scaf72: 1473937–1483913 |
| <i>lactate dehydrogenase</i>                  | <i>Ldh</i>   | BMgn012336 | chr1: 17338625–17350610  | Bm_scaf26: 2274069–2286054 |
| <i>Phosphogluconate dehydrogenase</i>         | <i>Pgd</i>   | BMgn012298 | chr1: 15112863–15127673  | Bm_scaf26: 48307–63117     |
| <i>Period</i>                                 | <i>per</i>   | BMgn000485 | chr1: 12956618–13004501  | Bm_scaf8: 7358664–7406547  |
| <i>Triosephosphate isomerase</i>              | <i>Tpi</i>   | BMgn000559 | chr1: 9023502–9027095    | Bm_scaf8: 3425548–3429141  |
| <i>Resistant to dieldrin</i>                  | <i>Rdl</i>   | BMgn000568 | chr1: 8060590–8089612    | Bm_scaf8: 2462636–2491658  |
| <i>kettin</i>                                 | <i>ket</i>   | BMgn000622 | chr1: 6513219–6533895    | Bm_scaf8: 915265–935941    |
| <i>ABC transporter family F protein ABCF2</i> | <i>ABCF2</i> | BMgn002004 | chr1: 4621452–4632826    | Bm_scaf23: 4621452–4632826 |
| <i>apterous</i>                               | <i>ap</i>    | BMgn002127 | chr1: 16146287–3516414   | Bm_scaf23: 3487639–3516414 |
| <i>Ribosomal protein P0</i>                   | <i>RpP0</i>  | BMgn003309 | chr15: 16146287–16150050 | Bm_scaf42: 3154684–3158447 |
| <i>Acetylcholinesterase 1</i>                 | <i>Ace-1</i> | BMgn003320 | chr15: 15498774–15629164 | Bm_scaf42: 2507171–2637561 |
| <i>Ribosomal protein L10</i>                  | <i>RpL10</i> | BMgn003337 | chr15: 14491197–14493497 | Bm_scaf42: 1499594–1501894 |
| <i>mago nashi</i>                             | <i>mago</i>  | BMgn003398 | chr15: 14026190–14028026 | Bm_scaf42: 1034587–1036423 |
| <i>nanchung</i>                               | <i>nan</i>   | BMgn003369 | chr15: 13344997–13360742 | Bm_scaf42: 353394–369139   |
| <i>Isocitrate dehydrogenase 2</i>             | <i>Idh-2</i> | BMgn007586 | chr15: 11046109–11053231 | Bm_scaf66: 1438373–1445495 |
| <i>ABC transporter family C protein ABCC2</i> | <i>ABCC2</i> | BMgn007793 | chr15: 8949057–8952178   | Bm_scaf3: 1002086–1005207  |
| <i>Ribosomal protein S5</i>                   | <i>RpS5</i>  | BMgn007710 | chr15: 7586843–7587692   | Bm_scaf3: 2366572–2367421  |
| <i>Notch</i>                                  | <i>N</i>     | BMgn007929 | chr15: 2349576–2409970   | Bm_scaf3: 7544294–7604688  |
| <i>Elongation factor 1 alpha</i>              | <i>EF-1α</i> | BMgn003608 | chr5: 17105811–17109595  | Bm_scaf9: 615825–619609    |
| <i>Acetylcholinesterase 2</i>                 | <i>Ace-2</i> | N/A        | chr9                     | nscaf3045/nscaf3047        |

\*KAIKObase version 3.2.2 (<http://sgp.dna.affrc.go.jp/KAIKO>; Accessed February 3, 2012).

**Table S2. List of the partial sequences of tortricid genes obtained in this study**

| Species                      | Name*           | GenBank acc. no. | Degenerate primer (forward) | Degenerate primer (reverse) |
|------------------------------|-----------------|------------------|-----------------------------|-----------------------------|
| <i>Cydia pomonella</i>       | <i>Shaker</i>   | JQ771337         | AAYGARTAYTTYTTYGAYAGRAA     | ACRTGRTRTAAARTTYTNGNAYTGCA  |
|                              | <i>Ldh</i>      | JQ771341         | GGNCARGTNGGNATGGC           | CCDATNGCCCANGANGTRTA        |
|                              | <i>Pgd</i>      | JQ771338         | GTNATGGGNCARAACTNAT         | TGNCCNGTCCARTTNGTRTG        |
|                              | <i>Tpi</i>      | JQ771343         | GGIAAYTGGAARATGAAYGG        | CCICCIACYAARAAICCRTC        |
|                              | <i>Rdl</i>      | JQ771335         | GAYTTYTAYTTYAGRCARTTYTGG    | ATCCARTACATNAGRTRTAAARCA    |
|                              | <i>kettin</i>   | JQ771344         | AARGTIGAYACITTYGARTA        | ATTGGGTATTATCGGAACG         |
|                              | <i>ABCF2</i>    | JQ771334         | CARTGYGTNATGGARGTNGAYGA     | GCRTCDATNGTYTCCATRTC        |
|                              | <i>apterous</i> | JQ771339         | GCNGTNGAYAGRCARTGGCA        | CCAYTTNGCNGCNGCRTTYTGRAACC  |
|                              | <i>RpP0</i>     | JQ771358         | ATGGGTAGGGAGGACAARGC        | AGACCRAAGCCCATGTCTGTC       |
|                              | <i>Ace-1</i>    | JQ771354         | CGATACAAGGCATTCTGCCA        | AAGTTTTGGTGCCTAAGG          |
|                              | <i>RpL10</i>    | JQ771357         | GACAAGCGTTTCWSYGGMAC        | TTYCARATGAAGGTDYTG          |
|                              | <i>mago</i>     | JQ771353         | AAYTAYAARAAYGAYACNATGAT     | TADATNGGYTTDATYTTTAAARTG    |
|                              | <i>nanchung</i> | JQ771346         | CCNTTYGTNGTNGATGATHTA       | TANGTRTTNCCCATCATNGC        |
|                              | <i>Idh-2</i>    | JQ771360         | GARATGGAYGGNGAYGARATG       | RTGYTCRTACCADATYTTNGC       |
|                              | <i>ABCC2</i>    | JX258668         | AARAGYCCNGTNTTYGGNATG       | TNRCNGTNGCYTCRTCCAT         |
|                              | <i>RpS5</i>     | JQ771355         | GRTGGAGYTYTAYGATGT          | GAGTTWGATGARCCPTRGC         |
|                              | <i>Notch</i>    | JX307647         | AAYAAYGCNGARTGYAAYTGGA      | ATYTGRAANACNCCCATNGCRTC     |
| <i>Lobesia botrana</i>       | <i>EF-1α</i>    | JX258662         | AARGARGCNCARGARATGGG        | GCNACNGTYTGYCTCATRTC        |
|                              | <i>Ace-1</i>    | JQ771363         | ACNGGNAARAARGTNGAYGCNTGG    | GCRAARTTNGCCCARTAYCTCAT     |
|                              | <i>mago</i>     | JQ771369         | AAYTAYAARAAYGAYACNATGAT     | TADATNGGYTTDATYTTTAAARTG    |
|                              | <i>Notch</i>    | JX258667         | AAYAAYGCNGARTGYAAYTGGA      | ATYTGRAANACNCCCATNGCRTC     |
| <i>Eupoecilia ambiguella</i> | <i>EF-1α</i>    | JX258665         | AARGARGCNCARGARATGGG        | GCNACNGTYTGYCTCATRTC        |
|                              | <i>Ace-1</i>    | JQ771362         | ACNGGNAARAARGTNGAYGCNTGG    | GCRAARTTNGCCCARTAYCTCAT     |
|                              | <i>mago</i>     | JQ771368         | AAYTAYAARAAYGAYACNATGAT     | TADATNGGYTTDATYTTTAAARTG    |
|                              | <i>Notch</i>    | JQ771361         | AAYAAYGCNGARTGYAAYTGGA      | ATYTGRAANACNCCCATNGCRTC     |
|                              | <i>EF-1α</i>    | JX258666         | AARGARGCNCARGARATGGG        | GCNACNGTYTGYCTCATRTC        |

\*For full gene names, see Table S1.

**Table S3. List of the *C. pomonella* BAC clones mapped in this study**

| Gene*                          | BAC clone | Primers used for synthesis of hybridization probes |                          | Primers used to confirm the presence of respective gene |                          |
|--------------------------------|-----------|----------------------------------------------------|--------------------------|---------------------------------------------------------|--------------------------|
|                                |           | Forward                                            | Reverse                  | Forward                                                 | Reverse                  |
| <i>Shaker</i>                  | 20G10     | M13-26                                             | M13-24                   | AGTCCAAGTTCTCGCATCGA                                    | TACTCTGGCCACTGTGGTCCG    |
| <i>Ldh</i>                     | 34N14     | ATCGCCAGTAACCCCGTGG                                | CGCTGCTGTCTCCGTGTT       | ATCGCCAGTAACCCCGTGG                                     | CGCTGCTGTCTCCGTGTT       |
| <i>Pgd</i>                     | 03A23     | M13-26                                             | M13-24                   | TGCTAATGAAGCAAAGGAACA                                   | GCGTGTGTGTCCATGTAT       |
| <i>period</i>                  | 23C16     | ATAGACTTCGTCCACCCCTTG                              | CTGGATTGTGCTCATTGTAGT    | ACCTTCATACCCTTCCTGTGTTG                                 | TAAAAGACGACCACCTCCGTTT   |
| <i>Tpi</i>                     | 32P12     | GGIAAYTGGAARATGAAYGG                               | ATIGCCCAIACIGGYTCRTA     | CATTGGCGAGACCCCTGGA                                     | GTTCGTAGGCCAGCACCA       |
| <i>Rdl</i>                     | 23P13     | M13-26                                             | M13-24                   | AGGCAGTCTGGACAGATCCACG                                  | TGTATCGGATGTCCCGCATGGTG  |
| <i>kettin</i>                  | 33L16     | GTCACAGGCAGACCTTACC                                | ATTGGGTATTATCGGAACG      | GAAGCTGACGCGATTTCGAT                                    | TTAGGGGTACCACCTTGCT      |
| <i>ABCF2</i>                   | 25J19     | M13-26                                             | M13-24                   | CTCAAGACCAGCTAATGGACGTG                                 | TCGTCCAGCAGTAGCAAGTGTGG  |
| <i>apterous</i>                | 01K03     | M13-26                                             | M13-24                   | GCGGTGGACAGACAGTGGCA                                    | GCCGGCAGTAGACCAGGTTG     |
| <i>RpP0</i>                    | 12O03     | M13-26                                             | M13-24                   | ATGGGTAGGGAGGACAAAGC                                    | CCTTGATGAATTCCTTGATAG    |
| <i>RpL10</i>                   | 08A23     | M13-26                                             | M13-24                   | TTCTGGGAGACCAGCAGCAC                                    | AACTTGATGGTGGCCCTTGAC    |
| <i>mago</i>                    | 28B17     | TGATCGGAGAGGAGCATATC                               | TAGATGGGCTTAATCTTGAATG   | TGATCGGAGAGGAGCATATC                                    | TTTCAAATCCTGCACAAGGT     |
| <i>nanchung</i>                | 40B18     | CAGAATGGTGATGGGTGACTTGC                            | AGCTTCTATCTCGTGGTTCGGTGC | CAGAATGGTGATGGGTGACTTGC                                 | AGCTTCTATCTCGTGGTTCGGTGC |
| <i>ldh-2</i>                   | 12E19     | M13-26                                             | M13-24                   | CGCCTGATGAACAGAGAGTT                                    | ATTTCACCTTTCCAGGTTT      |
| <i>ABCC2</i>                   | 23H24     | ACAATATCGGGCTTGTCAC                                | TGTCCACGGAGAAATTACC      | ACAATATCGGGCTTGTCAC                                     | TGTCCACGGAGAAATTACC      |
| <i>RpS5</i>                    | 32D15     | GATGGAGCTGTACGATGTC                                | TCGTCTGCGACGCACTCCGCG    | GATGGAGCTGTACGATGTC                                     | TCGTCTGCGACGCACTCCGCG    |
| <i>Notch</i>                   | 19N22     | M13-26                                             | M13-24                   | CGGCCCGGACGGACAAGAGAT                                   | ATGGACGAGCAGCACCTTGA     |
| <i>EF-1<math>\alpha</math></i> | 09J15     | M13-26                                             | M13-24                   | TGATTACACTGTTTGGGGAGTC                                  | TCCTTCATCTTGATTACTTCCG   |
| <i>Ace-2</i>                   | 11F21     | AAGACAATGCGCGGTATTG                                | TCCTTCATCTTGATTACTTCCG   | TGATTACACTGTTTGGGGAGTC                                  | TCCTTCATCTTGATTACTTCCG   |

\*For full gene names, see Table S1.

**Table S4. Results of quantitative PCR**

| Species              | Target        | Sex* | Target-to-reference gene dose ratio, <i>R</i> |                        |                         |                 |                                         |                                            |                                      | <i>P</i>                                 |                                          |
|----------------------|---------------|------|-----------------------------------------------|------------------------|-------------------------|-----------------|-----------------------------------------|--------------------------------------------|--------------------------------------|------------------------------------------|------------------------------------------|
|                      |               |      | Sample I <sup>†</sup>                         | Sample II <sup>†</sup> | Sample III <sup>†</sup> | Mean $\pm$ SD   | <i>E</i> <sub>target</sub> <sup>‡</sup> | <i>E</i> <sub>reference</sub> <sup>‡</sup> | Corrected mean $\pm$ SD <sup>‡</sup> | <i>H</i> <sub>0</sub> (1:1) <sup>§</sup> | <i>H</i> <sub>0</sub> (2:1) <sup>§</sup> |
| <i>C. pomonella</i>  | <i>kettin</i> | M    | 2.05                                          | 1.80                   | 1.96                    | 1.94 $\pm$ 0.13 | 0.93                                    | 0.87                                       | 0.96 $\pm$ 0.04                      | 0.001                                    | 0.798                                    |
|                      |               | F    | 0.99                                          | 0.95                   | 0.85                    | 0.93 $\pm$ 0.07 | 0.93                                    | 0.87                                       | 0.47 $\pm$ 0.02                      | —                                        | —                                        |
|                      | <i>Ace-2</i>  | M    | 2.15                                          | 2.24                   | 2.21                    | 2.20 $\pm$ 0.04 | 0.90                                    | 0.85                                       | 1.14 $\pm$ 0.02                      | 0.523                                    | —                                        |
|                      |               | F    | 1.80                                          | 1.92                   | 2.42                    | 2.05 $\pm$ 0.33 | 0.90                                    | 0.85                                       | 1.08 $\pm$ 0.12                      | —                                        | —                                        |
|                      | <i>Ace-1</i>  | M    | 2.23                                          | 1.92                   | 2.24                    | 2.13 $\pm$ 0.18 | 0.93                                    | 0.86                                       | 0.90 $\pm$ 0.06                      | 0.004                                    | 0.841                                    |
|                      |               | F    | 1.01                                          | 0.95                   | 1.05                    | 1.01 $\pm$ 0.05 | 0.93                                    | 0.86                                       | 0.45 $\pm$ 0.02                      | —                                        | —                                        |
|                      | <i>mago</i>   | M    | 1.20                                          | 1.36                   | 1.39                    | 1.32 $\pm$ 0.10 | —                                       | —                                          | —                                    | 0.464                                    | —                                        |
|                      |               | F    | 1.40                                          | 1.22                   | 1.06                    | 1.23 $\pm$ 0.17 | —                                       | —                                          | —                                    | —                                        | —                                        |
|                      | <i>Notch</i>  | M    | 0.77                                          | 0.94                   | 0.90                    | 0.86 $\pm$ 0.11 | —                                       | —                                          | —                                    | 0.005                                    | 0.757                                    |
|                      |               | F    | 0.39                                          | 0.47                   | 0.41                    | 0.43 $\pm$ 0.06 | —                                       | —                                          | —                                    | —                                        | —                                        |
| <i>L. botrana</i>    | <i>Ace-1</i>  | M    | 0.90                                          | 0.90                   | 0.91                    | 0.91 $\pm$ 0.01 | —                                       | —                                          | —                                    | 0.001                                    | 0.145                                    |
|                      |               | F    | 0.48                                          | 0.47                   | 0.53                    | 0.49 $\pm$ 0.03 | —                                       | —                                          | —                                    | —                                        | —                                        |
|                      | <i>mago</i>   | M    | 0.97                                          | 0.82                   | 1.00                    | 0.93 $\pm$ 0.10 | —                                       | —                                          | —                                    | 0.788                                    | —                                        |
|                      |               | F    | 0.91                                          | 0.89                   | 0.94                    | 0.91 $\pm$ 0.02 | —                                       | —                                          | —                                    | —                                        | —                                        |
| <i>Notch</i>         | M             | 1.27 | 0.97                                          | 1.00                   | 1.08 $\pm$ 0.16         | —               | —                                       | —                                          | 0.009                                | 0.236                                    |                                          |
|                      | F             | 0.49 | 0.34                                          | 0.50                   | 0.44 $\pm$ 0.09         | —               | —                                       | —                                          | —                                    | —                                        |                                          |
| <i>E. ambiguella</i> | <i>Ace-1</i>  | M    | 1.33                                          | 1.40                   | 1.31                    | 1.34 $\pm$ 0.05 | —                                       | —                                          | —                                    | <0.001                                   | 0.514                                    |
|                      |               | F    | 0.71                                          | 0.63                   | 0.61                    | 0.65 $\pm$ 0.05 | —                                       | —                                          | —                                    | —                                        | —                                        |
|                      | <i>mago</i>   | M    | 1.08                                          | 1.12                   | 0.96                    | 1.05 $\pm$ 0.08 | —                                       | —                                          | —                                    | 0.001                                    | 0.309                                    |
|                      |               | F    | 0.55                                          | 0.38                   | 0.44                    | 0.46 $\pm$ 0.08 | —                                       | —                                          | —                                    | —                                        | —                                        |
|                      | <i>Notch</i>  | M    | 2.11                                          | 2.35                   | 2.27                    | 2.24 $\pm$ 0.12 | 0.84                                    | 0.89                                       | 1.24 $\pm$ 0.06                      | <0.001                                   | 0.242                                    |
|                      |               | F    | 1.05                                          | 0.94                   | 0.88                    | 0.96 $\pm$ 0.08 | 0.84                                    | 0.89                                       | 0.57 $\pm$ 0.04                      | —                                        | —                                        |

\*M, male; F, female.

<sup>†</sup>Mean value (*n* = 3) in three independent samples (I–III).

<sup>‡</sup>If *R* was much higher than 1 in males, then it was corrected by the actual PCR efficiencies (*E*) calculated from the slope of the standard curve.

<sup>§</sup>Null hypothesis (*H*<sub>0</sub>) of no difference (1:1) or a twofold difference (2:1) in the means between males and females was tested by unpaired two-tailed *t* test for unequal variances (*P* > 0.05 means no significant difference from the 1:1 and 2:1 ratios, respectively).

**Table S5. List of primers used for qPCR**

| Species                      | Gene                           | Forward                | Reverse                |
|------------------------------|--------------------------------|------------------------|------------------------|
| <i>Cydia pomonella</i>       | <i>kettin</i>                  | ACCAGAAGGTACGTGGGCGA   | CACGTTACCCGTGGCTTGGG   |
|                              | <i>Ace-1</i>                   | CTGCCACATTCATGCGTTCA   | ACCCAAAGCATAACAGCTGC   |
|                              | <i>mago</i>                    | TGATCGGAGAGGAGCATATC   | TTTCAAATCCTGCACAAGGT   |
|                              | <i>Notch</i>                   | CAACGCCTTCCCCATCTCAA   | TTGTAACGGCGCAGAGGAAGC  |
|                              | <i>EF-1<math>\alpha</math></i> | TACACTGTTTGGGGAGTCAGCT | TTCCAATATCTTGAGCGCGT   |
| <i>Lobesia botrana</i>       | <i>Ace-2</i>                   | CTGGTCAAGGGATGGCAGA    | ACCAATACCGCCGATTTTGT   |
|                              | <i>Ace-1</i>                   | CCTGTTGAAAGTTGGGGAGACG | GGCCTGGGTCTAGGTGTGAC   |
|                              | <i>mago</i>                    | CCCTTCTGGGTGCGGAGATTG  | TGCACCCCTGCGTAATGGATG  |
|                              | <i>Notch</i>                   | TCCAAGCATTGCTATCGCC    | GGGAACCATGTTATACCGG    |
|                              | <i>EF-1<math>\alpha</math></i> | AGGTGCGAATACAACAATGG   | GCAAGGCTGAAGGCAAGTG    |
| <i>Eupoecilia ambiguella</i> | <i>Ace-1</i>                   | ACACTGCCTCATTTCATGCGT  | ACCCAGAGCATGACAGCTG    |
|                              | <i>mago</i>                    | CGGAGACCTTCTGGATCACGGG | AGTTCACCAGAATTGCCCGTCT |
|                              | <i>Notch</i>                   | TCCAAGCATTGCTATCGCC    | GGGAACCATGTTATACCGG    |
|                              | <i>EF-1<math>\alpha</math></i> | CGTTCCAATACCGCCGATTTTG | TTGGTTCAAGGGATGGAACGT  |
